# Supplementary material for: A novel chlorine-containing borophosphate based on (4,3)-connected 3-D borophosphate anion [B6P11O42(OH)2]13− with unique B : P ratio and 22-tetrahedral cages
Source: Royal Society of Chemistry journal article supplement (doi:10.1039/c3ce26918c), 2013-01-01
Supplement: c3ce26918c.pdf [file c3ce26918c.pdf]

## Supporting Information

### Figure Captions

- Figure S1.** IR spectrum of compound **1**  
**Figure S2.** TG and DTG curves of **1**  
**Figure S3.** Energy dispersive spectroscopy for K<sup>+</sup> ion exchanged sample  
**Figure S4.** Energy dispersive spectroscopy for **1**
- Table S1.** Crystallographic data and refinement results of **1**.  
**Table S2.** Selected bond lengths [Å] and angles [°] for **1**.

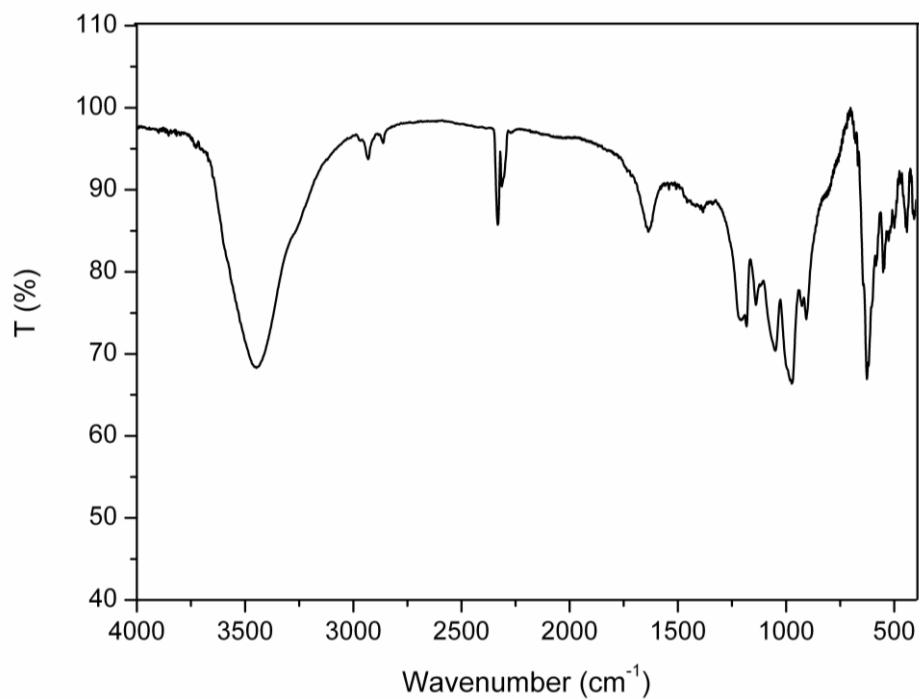

**Figure S1.**

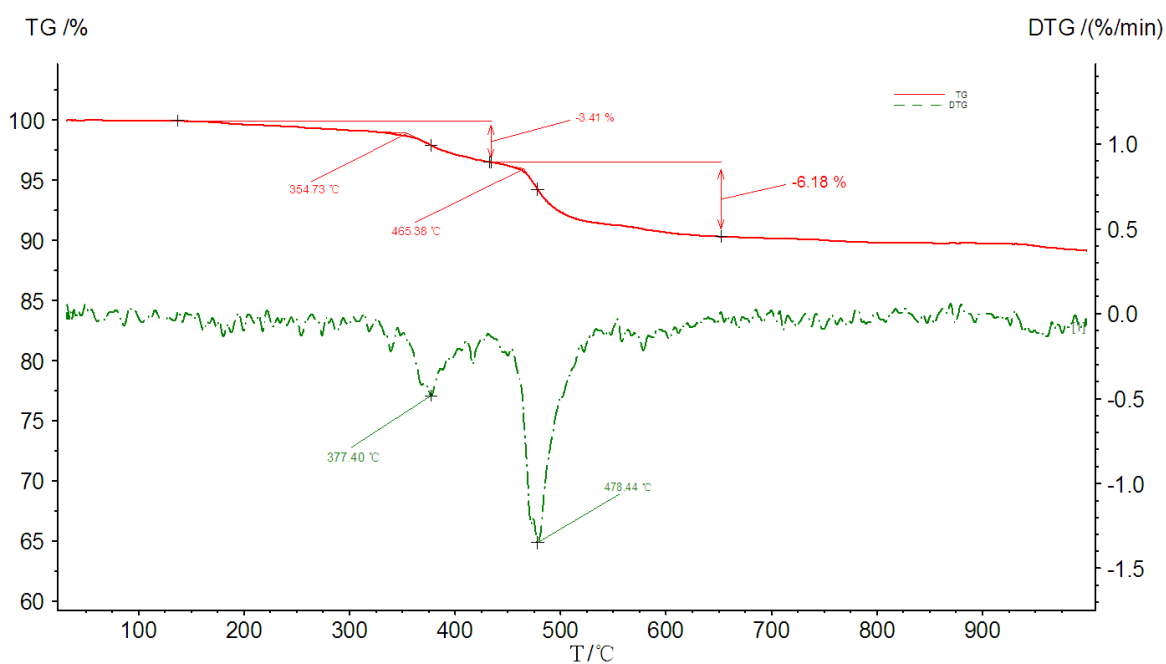

**Figure S2.**

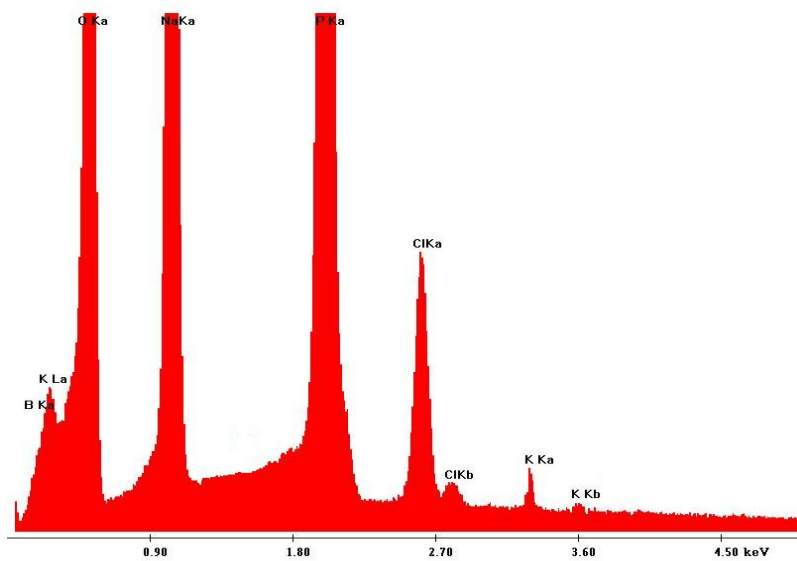

Figure S3.

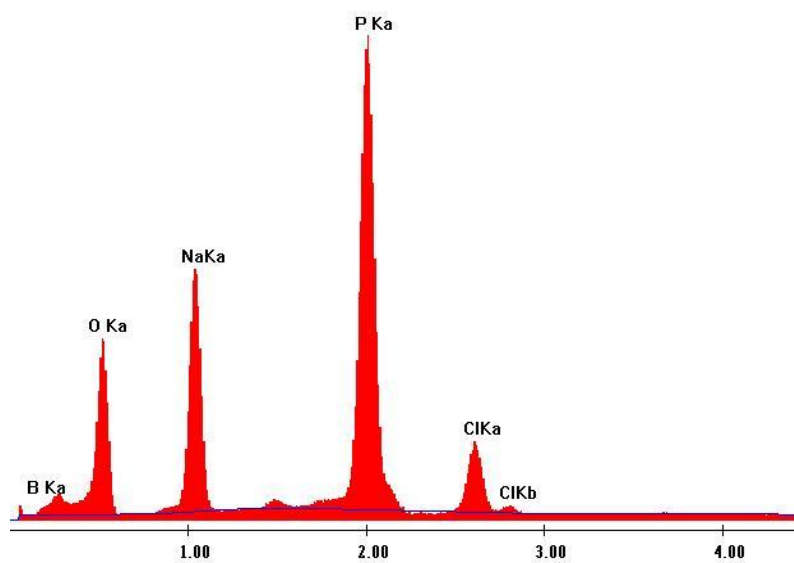

Figure S4.

**Table S1**

|                                                                         |                                                                                                 |
|-------------------------------------------------------------------------|-------------------------------------------------------------------------------------------------|
| Empirical formula                                                       | B <sub>6</sub> Cl <sub>2</sub> H <sub>10</sub> Na <sub>13</sub> O <sub>47</sub> P <sub>11</sub> |
| Formula weight                                                          | 1537.38                                                                                         |
| Temperature/K                                                           | 296(2)                                                                                          |
| Crystal system                                                          | cubic                                                                                           |
| Space group                                                             | <i>F</i> 23 (No. 196)                                                                           |
| <i>a</i> /Å                                                             | 20.479(7)                                                                                       |
| <i>V</i> /Å <sup>3</sup>                                                | 8589(5)                                                                                         |
| <i>Z</i>                                                                | 8                                                                                               |
| <i>D<sub>c</sub></i> / g·cm <sup>-3</sup>                               | 2.378                                                                                           |
| <i>μ</i> /mm <sup>-1</sup>                                              | 0.833                                                                                           |
| Crystal size/mm <sup>3</sup>                                            | 0.18 x 0.16 x 0.12                                                                              |
| 2 <i>θ</i> range/ °                                                     | 3.44-51.86                                                                                      |
| <i>hkl</i> range                                                        | -26 ≤ <i>h</i> ≤ 26, -13 ≤ <i>k</i> ≤ 26,<br>-26 ≤ <i>l</i> ≤ 26                                |
| <i>F</i> (000)                                                          | 6064                                                                                            |
| Reflections collected                                                   | 13313                                                                                           |
| Unique data                                                             | 934                                                                                             |
| <i>R</i> <sub>int</sub>                                                 | 0.0674                                                                                          |
| Goodness-of-fit on <i>F</i> <sup>2</sup>                                | 1.061                                                                                           |
| <i>R</i> <sub>1</sub> <sup><i>a</i></sup> [ <i>I</i> > 2σ ( <i>I</i> )] | <i>R</i> <sub>1</sub> = 0.0504, <i>wR</i> <sub>2</sub> = 0.1171                                 |
| <i>wR</i> <sub>2</sub> <sup><i>b</i></sup> (all data)                   | <i>R</i> <sub>1</sub> = 0.0541, <i>wR</i> <sub>2</sub> = 0.1187                                 |

**Table S2**

|                  |          |                    |          |
|------------------|----------|--------------------|----------|
| B(1)-O(3)        | 1.437(8) | O(5)-B(1)-O(2)     | 109.0(5) |
| B(1)-O(5)        | 1.472(9) | O(8)#1-B(1)-O(2)   | 108.7(5) |
| B(1)-O(8)#1      | 1.458(8) | O(1)-P(1)-O(2)#2   | 114.2(2) |
| B(1)-O(2)        | 1.474(8) | O(1)-P(1)-O(2)     | 114.2(2) |
| P(1)-O(1)        | 1.493(4) | O(2)#2-P(1)-O(2)   | 104.3(2) |
| P(1)-O(2)#2      | 1.557(5) | O(1)-P(1)-O(2)#3   | 114.2(2) |
| P(1)-O(2)        | 1.557(5) | O(2)#2-P(1)-O(2)#3 | 104.3(2) |
| P(1)-O(2)#3      | 1.557(5) | O(2)-P(1)-O(2)#3   | 104.3(2) |
| P(2)-O(4)        | 1.491(6) | O(4)-P(2)-O(4)#4   | 115.0(5) |
| P(2)-O(4)#4      | 1.491(6) | O(4)-P(2)-O(3)     | 108.9(3) |
| P(2)-O(3)        | 1.577(5) | O(4)#4-P(2)-O(3)   | 113.2(3) |
| P(2)-O(3)#4      | 1.577(5) | O(4)-P(2)-O(3)#4   | 113.2(3) |
| P(3)-O(7)        | 1.490(5) | O(4)#4-P(2)-O(3)#4 | 108.9(3) |
| P(3)-O(6)        | 1.541(5) | O(3)-P(2)-O(3)#4   | 96.2(4)  |
| P(3)-O(8)        | 1.576(5) | O(7)-P(3)-O(6)     | 113.6(3) |
| P(3)-O(5)        | 1.558(5) | O(7)-P(3)-O(8)     | 112.7(3) |
| O(3)-B(1)-O(5)   | 108.7(6) | O(6)-P(3)-O(8)     | 105.2(3) |
| O(3)-B(1)-O(8)#1 | 112.3(5) | O(7)-P(3)-O(5)     | 111.9(3) |
| O(5)-B(1)-O(8)#1 | 109.5(5) | O(6)-P(3)-O(5)     | 109.3(3) |
| O(3)-B(1)-O(2)   | 108.5(5) | O(8)-P(3)-O(5)     | 103.4(3) |

Symmetry code: #1:  $-z + 3/2, x, -y + 3/2$ ; #2:  $y, z, x$ ; #3:  $z, x, y$ ; #4:  $-x+2, -y+2, z$ .
